# Supplementary material for: Facile interfacial charge transfer across hole doped cobalt-based MOFs/TiO2 nano-hybrids making MOFs light harvesting active layers in solar cells
Source: Royal Society of Chemistry journal article supplement (doi:10.1039/c5ta07180a), 2015-01-01
Supplement: c5ta07180a1.pdf [file c5ta07180a1.pdf]

## Electronic Supplementary Information (ESI) †

### **Facile interfacial charge transfer across hole doped cobalt-based MOFs/TiO<sub>2</sub> nano-hybrids leading to MOFs as light harvesting active layer in solar cell**

Deok Yeon Lee<sup>a</sup>, Iseul Lim<sup>a</sup>, Chan Yong Shin<sup>a</sup>, Supriya A. Patil<sup>a</sup>, Wonjoo Lee<sup>b</sup>, Nabeen K. Shrestha<sup>a\*</sup>, Joong Kee Lee<sup>c</sup>, Sung-Hwan Han<sup>a\*</sup>

<sup>a</sup>*Department of Chemistry, Hanyang University, Seoul 133-791, Republic of Korea.*

<sup>b</sup>*Department of Defense Ammunitions, Daeduk College, Daejeon 305-715, Republic of Korea.*

<sup>c</sup>*Korea Institute of Science and Technology, Seoul 136-791, Republic of Korea.*

*\*Corresponding :* [nabeenkshrestha@hotmail.com](mailto:nabeenkshrestha@hotmail.com) ; [shhan@hanyang.ac.kr](mailto:shhan@hanyang.ac.kr)

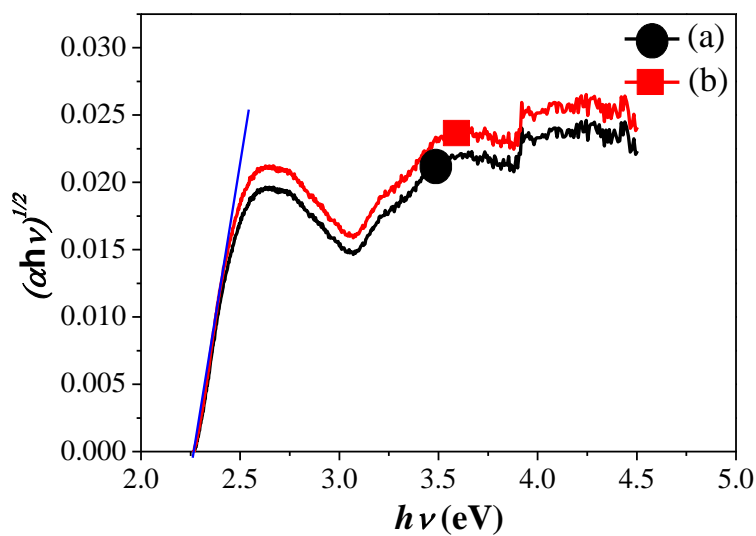

**Figure S1.** Band gap estimation of iodine treated Co-based MOF films. (a) *Co-BDC* film, and (b) *Co-NDC* film.

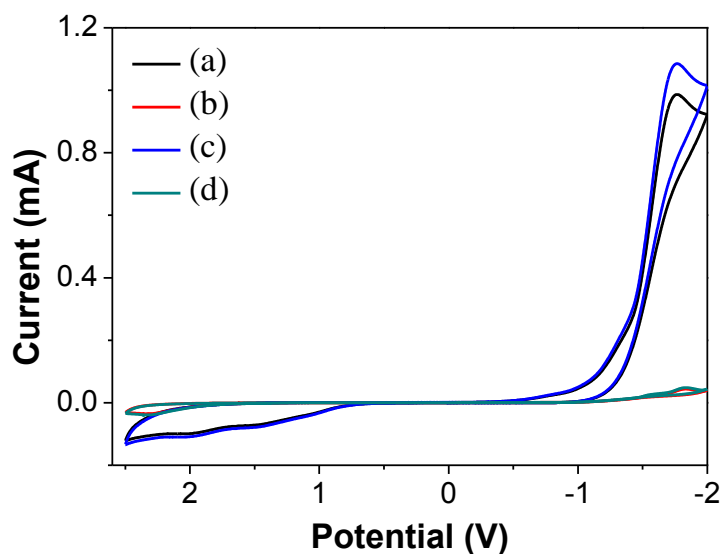

**Figure S2.** Cyclic voltammograms of MOF LbL films on a FTO glass substrate under  $N_2$  atmosphere. (a) iodine treated *Co-BDC* film, (b) pristine *Co-BDC* film, (c) iodine treated *Co-NDC*, and (d) pristine *Co-NDC*. W.E: MOF film on FTO, C.E: Pt wire, and R.E.: Ag/AgCl; Electrolyte: 0.1 M tetra-*n*-butylammonium tetrafluoroborate in acetonitrile.

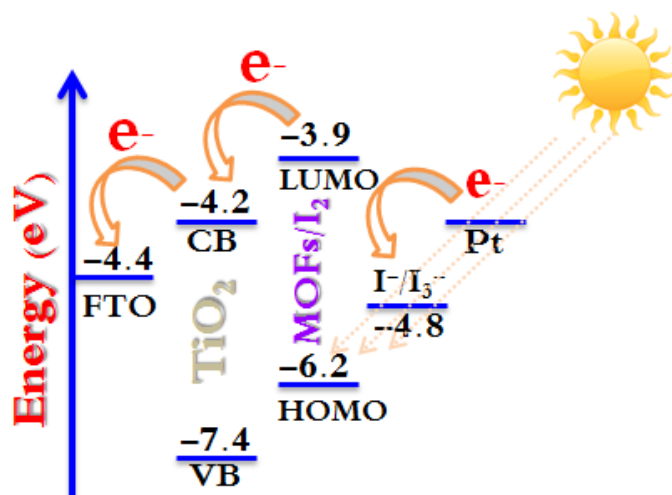

**Figure S3.** Light harvesting and charge injection mechanism of a device consisting of FTO/TiO<sub>2</sub>/I<sub>2</sub> treated Co- MOFs photoanode.

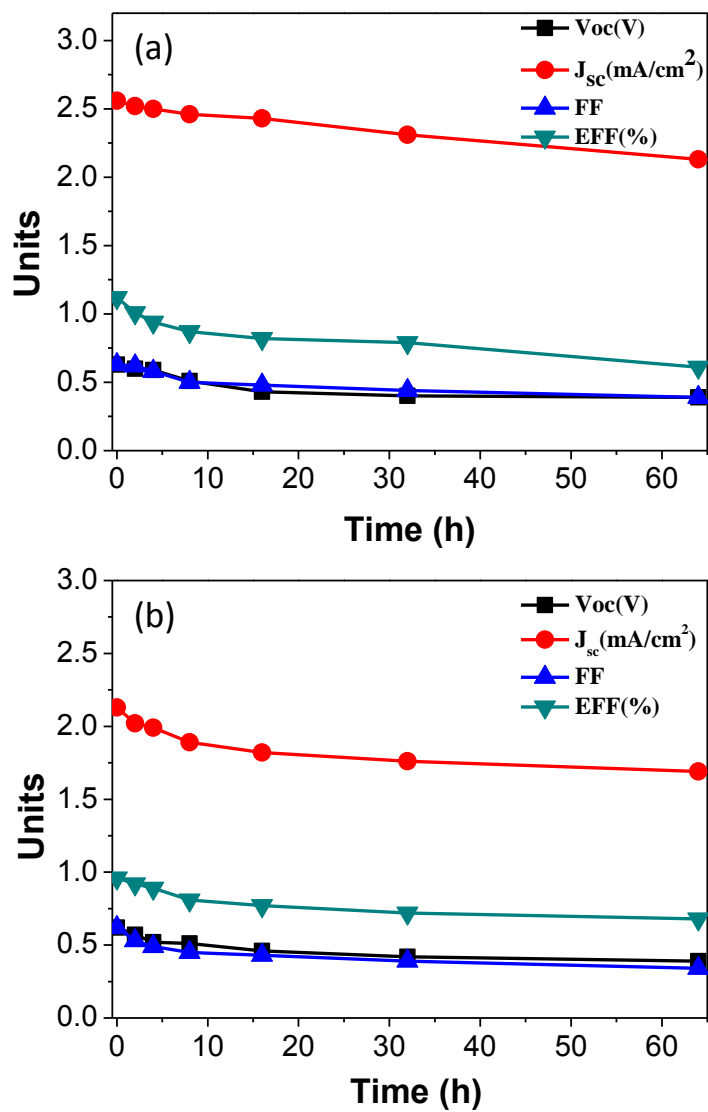

**Figure S4.** Device stability of solar cell with a photo-anode consisting of I<sub>2</sub> treated Co-MOF/TiO<sub>2</sub>/FTO in terms of photovoltaic performance at different intervals. (a) Co-NDC/TiO<sub>2</sub>/FTO, (b) Co-BDC/TiO<sub>2</sub>/FTO.

**Table S1.** Parameters obtained by fitting the impedance spectra using Z-View software. (a) iodine treated *Co-NDC*/TiO<sub>2</sub>/FTO, (b) iodine treated *Co-BDC*/TiO<sub>2</sub>/FTO, (c) pristine *Co-NDC*/TiO<sub>2</sub>/FTO, and (d) pristine *Co-BDC*/TiO<sub>2</sub>/FTO.

| Sample | R <sub>s</sub> (Ω) | R <sub>1</sub> (Ω) | R <sub>2</sub> (Ω) |
|--------|--------------------|--------------------|--------------------|
| (a)    | 7.66               | 2.38               | 32.28              |
| (b)    | 7.57               | 2.36               | 36.23              |
| (c)    | 7.58               | 2.29               | 154.81             |
| (d)    | 7.66               | 2.12               | 218.27             |
